# Supplementary material for: Albumin treatment regimen for type 1 hepatorenal syndrome: a dose–response meta-analysis
Source: Springer Nature journal article supplement (doi:10.1186/s12876-015-0389-9), 2015-11-25
Supplement: MOESM1 [file 9738402]

**Appendix 1: MOOSE checklist**

| Item                                                                                                                                                                                                                                                                         | Page/Other          |
|------------------------------------------------------------------------------------------------------------------------------------------------------------------------------------------------------------------------------------------------------------------------------|---------------------|
| Reporting of background should include                                                                                                                                                                                                                                       |                     |
| Problem definition                                                                                                                                                                                                                                                           | 3                   |
| Hypothesis statement                                                                                                                                                                                                                                                         | 5                   |
| Description of study outcome(s)                                                                                                                                                                                                                                              | 5                   |
| Type of exposure or intervention used                                                                                                                                                                                                                                        | 4                   |
| Type of study designs used                                                                                                                                                                                                                                                   | 4                   |
| Study population                                                                                                                                                                                                                                                             | 4                   |
| Reporting of search strategy should include                                                                                                                                                                                                                                  |                     |
| Qualifications of searchers (eg, librarians and investigators)                                                                                                                                                                                                               | n/a                 |
| Search strategy, including time period included in the synthesis and keywords                                                                                                                                                                                                | 4                   |
| Effort to include all available studies, including contact with authors                                                                                                                                                                                                      | 5                   |
| Databases and registries searched                                                                                                                                                                                                                                            | 4                   |
| Search software used, name and version, including special features used (eg, explosion)                                                                                                                                                                                      | 4                   |
| Use of hand searching (eg, reference lists of obtained articles)                                                                                                                                                                                                             | 4                   |
| List of citations located and those excluded, including justification                                                                                                                                                                                                        | Fig. 1              |
| Method of addressing articles published in languages other than English                                                                                                                                                                                                      | 4                   |
| Method of handling abstracts and unpublished studies                                                                                                                                                                                                                         | 4-5                 |
| Description of any contact with authors                                                                                                                                                                                                                                      | 5                   |
| Reporting of methods should include                                                                                                                                                                                                                                          |                     |
| Description of relevance or appropriateness of studies assembled for assessing the hypothesis to be tested                                                                                                                                                                   | 4                   |
| Rationale for the selection and coding of data (eg, sound clinical principles or convenience)                                                                                                                                                                                | 4                   |
| Documentation of how data were classified and coded (eg, multiple raters, blinding, and interrater reliability)                                                                                                                                                              | 4                   |
| Assessment of confounding (eg, comparability of cases and controls in studies where appropriate)                                                                                                                                                                             | 4                   |
| Assessment of study quality, including blinding of quality assessors; stratification or regression on possible predictors of study results                                                                                                                                   | 5                   |
| Assessment of heterogeneity                                                                                                                                                                                                                                                  | 5                   |
| Description of statistical methods (eg, complete description of fixed or random effects models, justification of whether the chosen models account for predictors of study results, dose-response models, or cumulative meta-analysis) in sufficient detail to be replicated | 5-6                 |
| Provision of appropriate tables and graphics                                                                                                                                                                                                                                 | 27-30 and Figs. 1-4 |
| Reporting of results should include                                                                                                                                                                                                                                          |                     |
| Graphic summarizing individual study estimates and overall estimate                                                                                                                                                                                                          | Figs. 2-3           |
| Table giving descriptive information for each study included                                                                                                                                                                                                                 | 28-29               |
| Results of sensitivity testing (eg, subgroup analysis)                                                                                                                                                                                                                       | 30                  |
| Indication of statistical uncertainty of findings                                                                                                                                                                                                                            | 30 and Figs. 2-4    |
| Reporting of discussion should include                                                                                                                                                                                                                                       |                     |
| Quantitative assessment of bias (eg, publication bias)                                                                                                                                                                                                                       | 30                  |
| Justification for exclusion (eg, exclusion of non-English-language citations)                                                                                                                                                                                                | n/a                 |
| Assessment of quality of included studies                                                                                                                                                                                                                                    | 30                  |
| Reporting of conclusions should include                                                                                                                                                                                                                                      |                     |
| Consideration of alternative explanations for observed results                                                                                                                                                                                                               | 10-11               |
| Generalization of the conclusions (ie, appropriate for the data presented and within the domain of the literature review)                                                                                                                                                    | 10-11               |
| Guidelines for future research                                                                                                                                                                                                                                               | 10-11               |
| Disclosure of funding source                                                                                                                                                                                                                                                 | 19                  |
| n/a, not applicable                                                                                                                                                                                                                                                          |                     |
